# Supplementary material for: Comparative efficacy and acceptability of antidepressant treatment in poststroke depression: a multiple-treatments meta-analysis
Source: PubMed Central journal article supplement — BMJ Open. 2017 Aug 3;7(8):e016499. doi: 10.1136/bmjopen-2017-016499 (PMC5629745; doi:10.1136/bmjopen-2017-016499), 2017-08-03
Supplement: bmjopen-2017-016499supp003.pdf [file bmjopen-2017-016499supp003.pdf]

### Supplementary File 3

## Results of meta-analyses of direct comparisons of drugs

Standardized mean differences (Hedges's g) for efficacy or odds ratios for efficacy for acceptability in pairwise meta-analyses of direct comparisons between each pair of antipsychotic agents or placebo. A random effects model was used throughout.

| Comparisons          |                  | N | n       | Overall efficacy<br>SMD (95% CI) | Acceptability<br>OR (95% CI) |
|----------------------|------------------|---|---------|----------------------------------|------------------------------|
| <b>Citalopram</b>    | vs Placebo       | 1 | 66      | -0.59 [-1.09, -0.10]             | 4.17 [0.80, 21.85]           |
| <b>Paroxetine</b>    | vs Placebo       | 1 | 48      | -2.71 [-3.51, -1.91]             | 2.50 [0.64, 9.82]            |
| <b>Doxepin</b>       | vs Placebo       | 1 | 48      | -2.63 [-3.42, -1.85]             | 0.09 [0.00, 1.83]            |
| <b>Fluoxetine</b>    | vs Placebo       | 3 | 12<br>5 | -0.24 [-1.04, 0.57]              | 2.45 [0.68, 8.76]            |
| <b>Nortriptyline</b> | vs Placebo       | 3 | 11<br>4 | -0.88 [-1.27, -0.49]             | 1.16 [0.33, 4.05]            |
| <b>Sertraline</b>    | vs Placebo       | 1 | 12<br>3 | -0.82 [-1.19, -0.45]             | 0.98 [0.30, 3.23]            |
| <b>Trazodone</b>     | vs Placebo       | 1 | 22      | -1.44 [-2.40, -0.49]             | Not estimable                |
| <b>Reboxetine</b>    | vs Placebo       | 1 | 31      | -6.54 [-8.42, -4.66]             | Not estimable                |
| <b>Nefiracetam</b>   | vs Placebo       | 1 | 11<br>1 | 0.05 [-0.32, 0.42]               | 1.42 [0.46, 4.40]            |
| <b>Duloxetine</b>    | vs Citalopram    | 1 | 40      | -0.89 [-1.55, -0.24]             | Not estimable                |
| <b>Duloxetine</b>    | vs Sertraline    | 1 | 40      | -0.85 [-1.50, -0.20]             | Not estimable                |
| <b>Citalopram</b>    | vs Sertraline    | 1 | 40      | 0.02 [-0.60, 0.64]               | Not estimable                |
| <b>Paroxetine</b>    | vs Doxepin       | 1 | 48      | -0.09 [-0.66, 0.47]              | 0.04 [0.00, 0.73]            |
| <b>Fluoxetine</b>    | vs Nortriptyline | 1 | 39      | 1.63 [0.88, 2.37]                | 2.79 [0.62, 12.60]           |

N = number of studies, n = number of participants, SMD = standardised meandifference, OR = Odds Ratio; vs.= versus; CI= Confidency Interval. For the continuous outcomes efficacy, negative values (standardised mean differences) favour the first treatment (in bold). For the dichotomous outcomes acceptability (retention in treatment), ORs lower than 1 favour the first treatment (in bold).
