# Supplementary material for: Comparative efficacy and acceptability of antidepressant treatment in poststroke depression: a multiple-treatments meta-analysis
Source: PubMed Central journal article supplement — BMJ Open. 2017 Aug 3;7(8):e016499. doi: 10.1136/bmjopen-2017-016499 (PMC5629745; doi:10.1136/bmjopen-2017-016499), 2017-08-03
Supplement: bmjopen-2017-016499supp005.pdf [file bmjopen-2017-016499supp005.pdf]

Supplementary File 5

## Sensitivity analyses

| <b>S Table-1: Sensitivity analyses on the primary outcome overall efficacy – effect sizes for each antidepressant versus placebo</b> |                      |            |                                         |            |
|--------------------------------------------------------------------------------------------------------------------------------------|----------------------|------------|-----------------------------------------|------------|
| Standardized mean differences and 95% credible intervals drug vs. placebo for efficacy, and ranks according to SUCRAs.               |                      |            |                                         |            |
| Drug name                                                                                                                            | Standard analysis    | SUCRA rank | Excluding 3 studies for early treatment | SUCRA rank |
| Reboxetine                                                                                                                           | -6.54 (-8.42, -4.65) | 1          | -6.54 (-8.41, -4.66)                    | 1          |
| Paroxetine                                                                                                                           | -2.70 (-3.46, 1.93)  | 2          | -2.70 (-3.42, -1.97)                    | 2          |
| Doxepin                                                                                                                              | -2.60 (-3.35, -1.84) | 3          | -2.60 (-3.31, -1.88)                    | 3          |
| Duloxetine                                                                                                                           | -1.49 (-2.37, -0.62) | 4          | -1.62 (-2.25, -0.98)                    | 4          |
| Trazodone                                                                                                                            | -1.44 (-2.43, -0.46) | 5          | -                                       | -          |
| Nortriptyline                                                                                                                        | -1.22 (-1.99, 0.46)  | 6          | -0.89 (-1.27, -0.50)                    | 5          |
| <b><u>Citalopram</u></b>                                                                                                             | -0.59 (-1.14, -0.04) | 7          | -0.66 (-1.07, -0.25)                    | 7          |
| <b><u>Sertraline</u></b>                                                                                                             | -0.61 (-1.47, 0.25)  | 8          | -0.78 (-1.12, -0.45)                    | 6          |
| Placebo                                                                                                                              | <i>Reference</i>     | 9          | <i>Reference</i>                        | 8          |
| Nefiracetam                                                                                                                          | 0.05 (-0.39, 0.49)   | 10         | 0.05 (-0.32, 0.42)                      | 9          |
| Fluoxetine                                                                                                                           | 0.51 (-0.17, 1.19)   | 11         | 0.63 (-0.05, 1.23)                      | 10         |

**S-Table 2: Sensitivity analyses on the secondary outcome acceptability – effect sizes for each antidepressant versus placebo**

Standardised mean differences and 95% credible intervals drug vs. placebo for efficacy, and ranks according to SUCRAs

| Drug name                   | Standard analysis  | SUCRA rank | Excluding 3 studies for early treatment | SUCRA rank |
|-----------------------------|--------------------|------------|-----------------------------------------|------------|
| Paroxetine                  | 0.09 (0.00, 1.83)  | 1          | 0.09 (0.00, 1.83)                       | 1          |
| Placebo                     | <i>Reference</i>   | 2          | <i>Reference</i>                        | 2          |
| <b><u>Sertraline</u></b>    | 1.09 (0.35, 3.43)  | 3          | 1.09 (0.35, 3.43)                       | 4          |
| <b><u>Nortriptyline</u></b> | 1.10 (0.38, 3.23)  | 4          | 1.09 (0.37, 3.26)                       | 3          |
| Trazodone                   | 1 (0.02, 54.83)    | 5          | -                                       |            |
| Reboxetine                  | 0.94 (0.02, 50.30) | 5          | 0.94 (0.02, 50.30)                      | 5          |
| Nefiracetam                 | 1.42 (0.46, 4.40)  | 7          | 1.42 (0.46, 4.40)                       | 6          |
| Duloxetine                  | 1.93 (0.05, 69.28) | 8          | 1.93 (0.05, 69.28)                      | 7          |
| Doxepin                     | 2.35 (0.63, 8.73)  | 9          | 2.35 (0.63, 8.73)                       | 8          |
| Fluoxetine                  | 2.52 (0.81, 7.84)  | 10         | 2.47 (0.69, 8.87)                       | 9          |
| Citalopram                  | 3.42 (0.73, 15.91) | 11         | 3.42 (0.73, 15.91)                      | 10         |
